# Supplementary material for: Two isostructural metal–organic frameworks with unique nickel clusters for C2H2/C2H6/C2H4 mixture separation
Source: Royal Society of Chemistry journal article supplement (doi:10.1039/d2ta01466a), 2022-01-01
Supplement: d2ta01466a1.pdf [file d2ta01466a1.pdf]

## Supporting information

### Two isostructural metal-organic frameworks with unique nickel clusters for C<sub>2</sub>H<sub>2</sub>/C<sub>2</sub>H<sub>6</sub>/C<sub>2</sub>H<sub>4</sub> mixture separation

Hao-Tian Wang,<sup>a</sup> Qiang Chen,<sup>a</sup> Xin Zhang,<sup>\*a</sup> Yan-Long Zhao,<sup>a</sup> Ming-Ming Xu,<sup>a</sup> Rui-Biao Lin,<sup>b</sup> Hongliang Huang,<sup>c</sup> Lin-Hua Xie,<sup>\*a</sup> Jian-Rong Li<sup>a</sup>

- a. Beijing Key Laboratory for Green Catalysis and Separation and Department of Environmental Chemical Engineering, Faculty of Environment and Life, Beijing University of Technology, Beijing 100124, China
- b. MOE Key Laboratory of Bioinorganic and Synthetic Chemistry, School of Chemistry, Sun Yat-Sen University, Guangzhou, 510006, China
- c. State Key Laboratory of Separation Membranes and Membrane Processes, School of Chemistry and Chemical Engineering, Tiangong University, Tianjin 300387, China.

\*correspondence: [zhang.xin@bjut.edu.cn](mailto:zhang.xin@bjut.edu.cn), [xielinhua@bjut.edu.cn](mailto:xielinhua@bjut.edu.cn)

#### Synthesis and Characterization of the Ligands

All chemicals and solvents were purchased and used as received unless specified. The synthesis of ligands is summarized in Scheme S1 and Scheme S2. And the <sup>1</sup>H/<sup>13</sup>C NMR spectra of two ligands are showed in Figure S1-4.

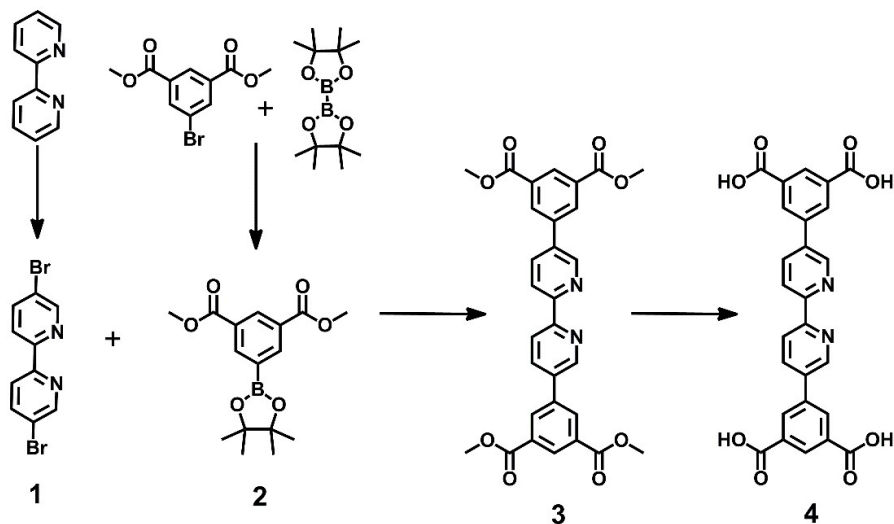

## **Scheme S1.** Synthetic route for H<sub>4</sub>DiBP.

### **Synthesis of 5,5'-dibromo-2,2'-bipyridine (1).**

This compound was synthesized following a modified literature procedure<sup>1</sup>. 2,2'-Bipyridine (20 g, 130 mmol) was dissolved in 80 mL of methanol before 39 mL of 40 % HBr (aq.) was added dropwisely to the solution. After overnight reaction at room temperature, the solvent was removed by rotary evaporation, and the resulting residue was dried at 120 °C for 12 h to yield 2,2'-bipyridine hydrobromide (95 %). 2,2'-Bipyridine hydrobromide (24 g, 75.4 mmol) and bromine (40 g, 125 mmol) were combined in a Teflon-lined stainless-steel Parr bomb and heated at 180 °C for 96 h. After cooling down to room temperature, the crude product was recrystallized in N, N'-dimethylformamide (DMF), and neutralized with aqueous KOH solution to obtain pure 5,5'-dibromo-2,2'-bipyridine. The product was further purified by a flash silica gel column using chloroform as the eluent (yield: 40 %). <sup>1</sup>H NMR (CDCl<sub>3</sub>, 400 MHz): 8.73 (s, 1 H); 8.31 (d, 1 H); 7.96 (dd, 1 H).

### **Synthesis of dimethyl 5-(4,4,5,5-tetramethyl-1,3,2-dioxaborolan-2-yl)isophthalate (2).**

This compound was synthesized following a modified literature procedure<sup>2</sup>. Dimethyl 5-bromoisophthalate (25 g, 91.5 mmol), bis(pinacolato)diborane (28 g, 110 mmol), potassium acetate (26 g, 264.9 mmol) and Pd(dppf)<sub>2</sub>Cl<sub>2</sub> (1 g, 1.4 mmol) were added into a double necked round bottom flask with a magnetic stir bar. After the air was removed by vacuum and the flask was refilled with nitrogen for three times, 150 mL of degassed dioxane (bubbled with nitrogen for 30 minutes) was added through cannula transfer. Then the reaction was heated at 100 °C overnight and afterward cooled down to room temperature, extracted with ethyl acetate (20 mL). The organic layer was dried with Na<sub>2</sub>SO<sub>4</sub> and the solvent was removed by a rotavapor. The crude product was purified by column chromatography (silica gel, ethyl acetate/petroleum ether, 6 v%). Yield 69.3%. <sup>1</sup>H NMR (CDCl<sub>3</sub>, 400 MHz): 8.79 (s, 1 H); 8.63 (d, 2 H); 3.97 (s, 6 H) 1.39 (s, 12 H).

### **Synthesis of tetramethyl 5,5'-([2,2'-bipyridine]-5,5'-diyl)diisophthalate (3).**

The compound **1** (2.512 g, 8 mmol) and **2** (7.68 g, 24 mmol) with potassium phosphate (5.28 g, 24.9 mmol) and Pd(PPh<sub>3</sub>)<sub>4</sub> (0.628 g, 0.543 mmol) were added into a double necked round bottom flask with a magnetic stir bar. After the air was removed by vacuum and the flask was refilled with nitrogen for three times, 150 mL of degassed dioxane (bubbled with nitrogen for 30 minutes) was added through cannula transfer. The resulting mixture was heated at 110 °C for three days with magnetic stirring. After cooled down to room temperature, the crude product was filtered through silica gel and washed with MeOH/CH<sub>2</sub>Cl<sub>2</sub> (1/1). After the solvent of filtrate was evaporated, the solid was recrystallized from ethanol to obtain a light-yellow solid in 70% yield. <sup>1</sup>H NMR (CDCl<sub>3</sub>, 400 MHz): 9.04 (d, 1 H); 8.76 (d, 1 H); 8.64 (d, 1 H); 8.57 (d, 2 H); 8.15 (dd, 1 H); 3.95 (s, 6 H).

#### Synthesis of 5,5'-([2,2'-bipyridine]-5,5'-diyl)diisophthalic acid (H<sub>4</sub>DiBP) (4).

Compound **3** (10 g, 20 mmol) and NaOH (4 g, 100 mmol) were added to the mixed solvent of THF/MeOH/H<sub>2</sub>O (1: 1: 1). The mixture was stirred under reflux overnight and the organic solvents were removed under a vacuum. 1M HCl was added dropwisely to the remaining aqueous solution until the solution was at pH = 7. The solid was collected by filtration, washed with water and dried to yield H<sub>4</sub>DiBP, 90% yield. <sup>1</sup>H NMR (d<sub>6</sub>-DMSO, 400 MHz): 9.11(d, 2 H); 8.57 (d, 2 H); 8.54 (s, 2 H); 8.49 (d, 4 H) 8.37 (dd, 2 H). <sup>13</sup>C NMR (d<sub>6</sub>-DMSO): δ 121.27, 130.04, 131.84, 133.07, 134.78, 136.26, 138.14, 148.11, 154.84 and 166.92. (Figure S1-S2).

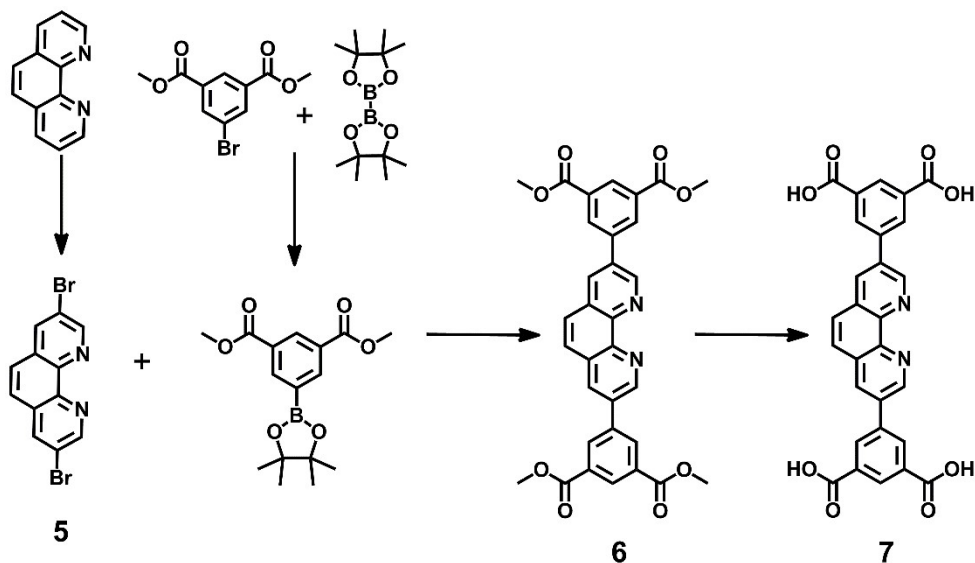

**Scheme S2.** Synthetic route for H<sub>4</sub>Diphen.

#### Synthesis of 3,8-dibromo-1,10-phenanthroline (5).

This compound was synthesized following a modified literature procedure<sup>3</sup>. In a 1000 mL three-necked round-bottomed flask, a mixture of 1,10-phenanthroline (10g, 55.6 mmol), S<sub>2</sub>Cl<sub>2</sub> (16 mL), pyridine (15 mL), and 1-chlorobutane (400 mL) was heated to 100 °C, then Br<sub>2</sub> (10.5 mL) was added very slowly. The reaction mixture was refluxed at 100 °C for 12 h. After cooled down to room temperature, the reaction was quenched by adding about 20 mL saturated NaOH (aq). After the solvent was evaporated, the crude solid product was washed with water and extracted with CH<sub>2</sub>Cl<sub>2</sub>. After the solvent was evaporated, the solid was washed with petroleum ether, and dissolved with CH<sub>2</sub>Cl<sub>2</sub>. The solution was filtered through silica gel and CH<sub>2</sub>Cl<sub>2</sub> was removed with a rotavapor to afford pure product (12 g; 35 mmol; 63 %). <sup>1</sup>H NMR (400 MHz, CDCl<sub>3</sub>): 9.21 (d, 1H), 8.43 (d, 1H), 7.78 (d, 1H).

#### Synthesis of 5,5'-(1,10-phenanthroline-3,8-diyl)diisophthalate (6).

The synthesis method is the same as **compound 3** synthesis, except that compound **1** was replaced by compound **5**. The solid was recrystallized from ethanol and dried to obtain a

bright yellow solid in 70% yield.  $^1\text{H}$ NMR (400 MHz,  $\text{d}_6\text{-DMSO}$ ): 9.52 (d, 1H), 8.81 (s, 1H), 8.68 (s, 2H), 8.55 (d, 1H), 8.00 (s, 1H), 4.06 (s, 6H).

### Synthesis of 5,5'-(1,10-phenanthroline-3,8-diyl)diisophthalic acid ( $\text{H}_4\text{DiPhen}$ ) (7).

The synthesis method is the same as **compound 4** synthesis, except that compound **3** was replaced by compound **6**. The solid was collected by filtration, washed with water and dried to yield  $\text{H}_4\text{DiPhen}$ , 90% yield.  $^1\text{H}$  NMR ( $\text{d}_6\text{-DMSO}$ , 400 MHz): 9.55 (d, 2 H); 9.32 (d, 2 H); 8.65 (d, 4 H); 8.53 (s, 2 H) 8.33 (s, 2 H).  $^{13}\text{C}$  NMR ( $\text{d}_6\text{-DMSO}$ ):  $\delta$  128.01, 129.08, 130.18, 131.94, 133.71, 133.76, 134.45, 137.96, 145.15, 148.91 and 167.16. (Figure S3,4).

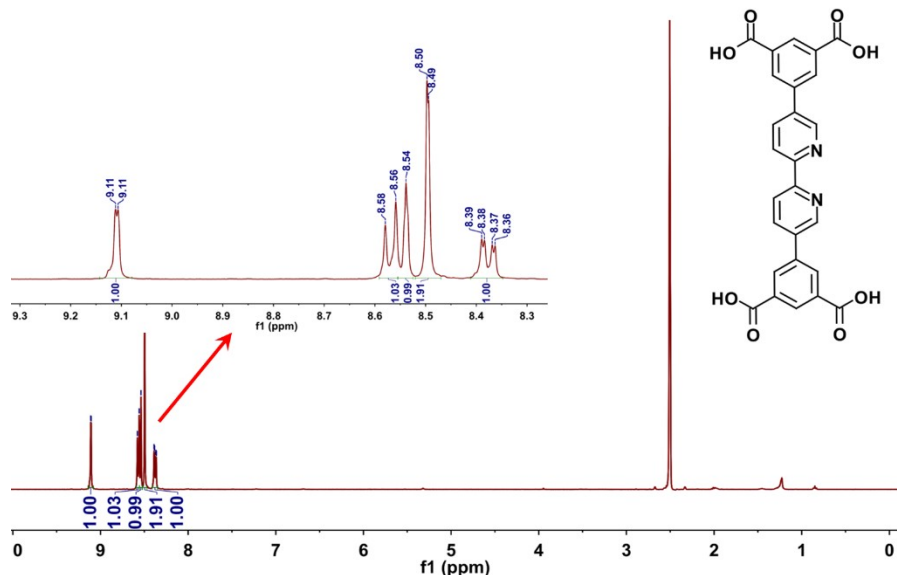

Figure S1.  $^1\text{H}$  NMR spectra of compound **4**.

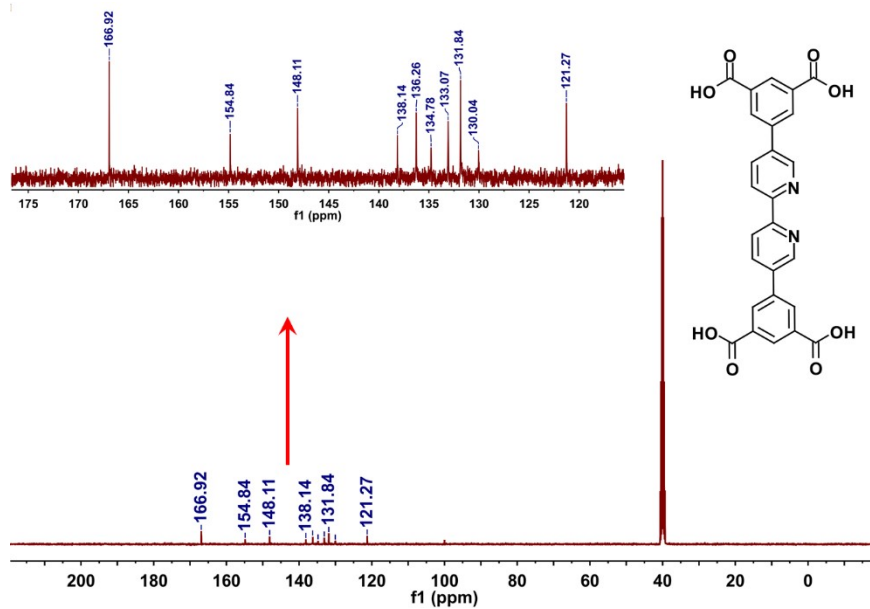

Figure S2.  $^{13}\text{C}$  NMR spectra of compound **4**.

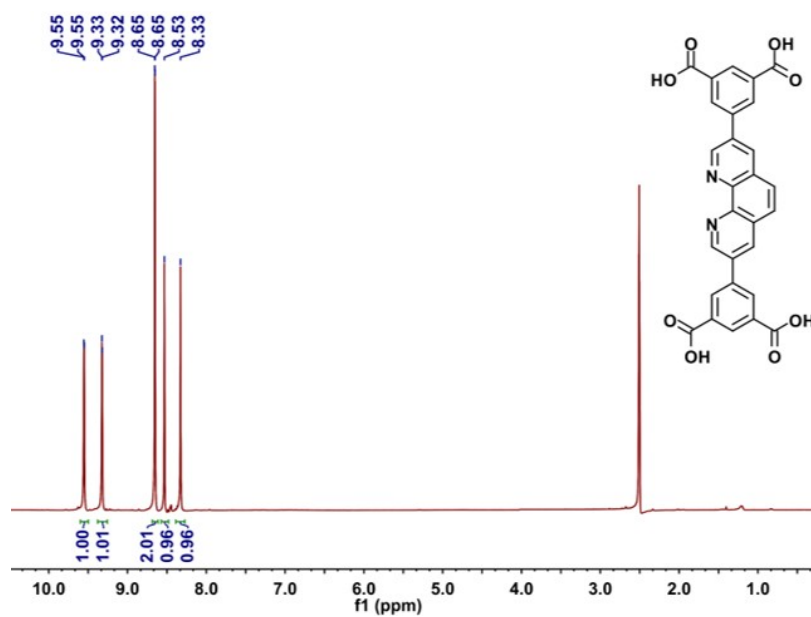

Figure S3.  $^1\text{H}$  NMR spectra of compound 7.

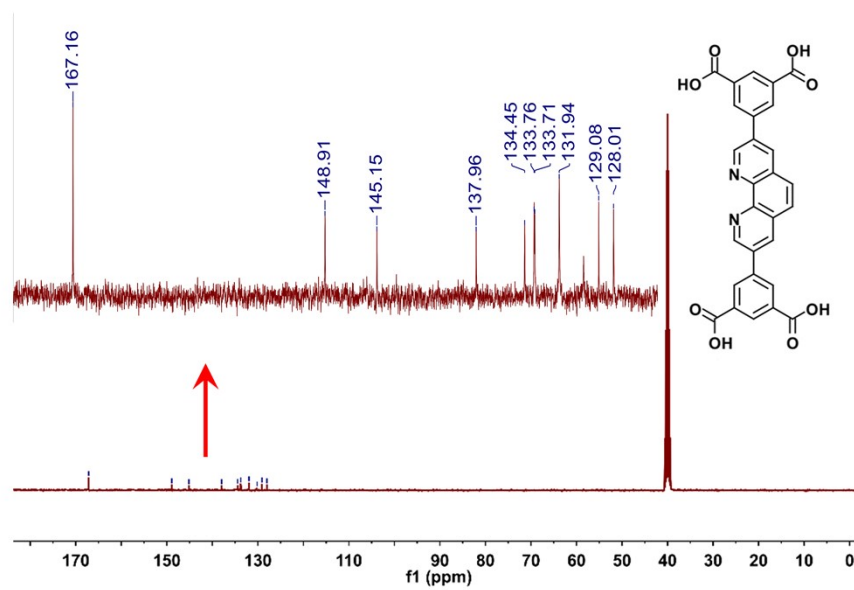

Figure S4.  $^{13}\text{C}$  NMR spectra of compound 7.

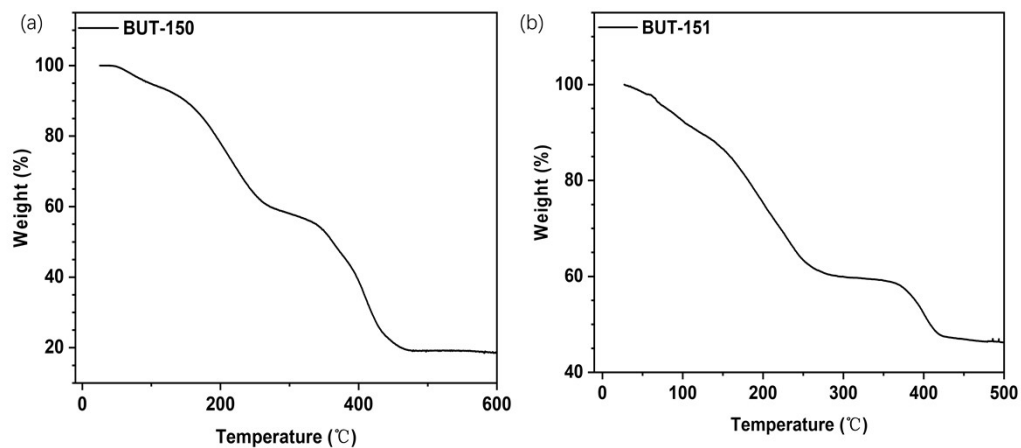

**Figure S5.** TGA curves of fresh MOF samples (a) BUT-150 and (b) BUT-151.

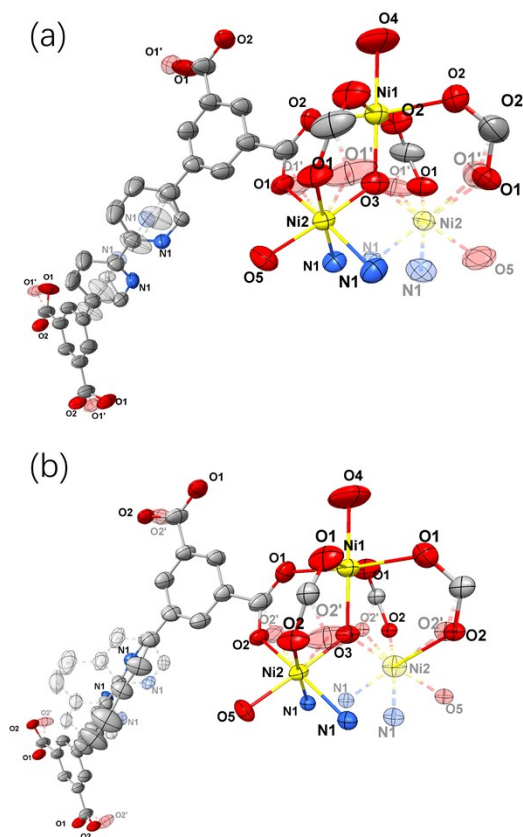

**Figure S6.** An ORTEP view of building units of BUT-150 (a) and BUT-151 (b). Displacement ellipsoids are represented by 50% probability level. One part of the disordered model is shown in transparency for clarity

**Table S1.** Crystal data and structure refinement for BUT-150 and BUT-151.

| Identification code                                                                                                                                                                | BUT-150                                                                                                        | BUT-151                                                                                                          |
|------------------------------------------------------------------------------------------------------------------------------------------------------------------------------------|----------------------------------------------------------------------------------------------------------------|------------------------------------------------------------------------------------------------------------------|
| CCDC                                                                                                                                                                               | 2142458                                                                                                        | 2142608                                                                                                          |
| Molecular formula                                                                                                                                                                  | Ni <sub>2</sub> (μ <sub>2</sub> -OH <sub>2</sub> )(DiBP)·(H <sub>2</sub> O) <sub>2</sub> ·(DMA) <sub>4.5</sub> | Ni <sub>2</sub> (μ <sub>2</sub> -OH <sub>2</sub> )(DiPhen)·(H <sub>2</sub> O) <sub>2</sub> ·(DMA) <sub>4.5</sub> |
| Formula weight                                                                                                                                                                     | 1043.89                                                                                                        | 1067.91                                                                                                          |
| Temperature/K                                                                                                                                                                      | 271(2)                                                                                                         | 220(2)                                                                                                           |
| Crystal system                                                                                                                                                                     | cubic                                                                                                          | cubic                                                                                                            |
| Space group                                                                                                                                                                        | Fd-3m                                                                                                          | Fd-3m                                                                                                            |
| a/Å                                                                                                                                                                                | 40.5215(5)                                                                                                     | 40.5322(3)                                                                                                       |
| Volume/Å <sup>3</sup>                                                                                                                                                              | 66536(2)                                                                                                       | 66588.7(15)                                                                                                      |
| Z                                                                                                                                                                                  | 48                                                                                                             | 48                                                                                                               |
| ρ <sub>calc</sub> /cm <sup>3</sup>                                                                                                                                                 | 1.251                                                                                                          | 1.278                                                                                                            |
| μ/mm <sup>-1</sup>                                                                                                                                                                 | 1.396                                                                                                          | 0.745                                                                                                            |
| F(000)                                                                                                                                                                             | 26304                                                                                                          | 26880                                                                                                            |
| Crystal size/mm <sup>3</sup>                                                                                                                                                       | 0.15× 0.15× 0.15                                                                                               | 0.15× 0.15× 0.15                                                                                                 |
| Radiation                                                                                                                                                                          | Cu Kα (λ = 1.54178)                                                                                            | Mo Kα (λ = 0.71073)                                                                                              |
| 2θ range for data collection/°                                                                                                                                                     | 3.779 to 68.141                                                                                                | 3.482 to 29.379                                                                                                  |
| Index ranges                                                                                                                                                                       | -45<= <i>h</i> <=48,<br>-48<= <i>k</i> <=48,<br>-39<= <i>l</i> <=39                                            | -30<= <i>h</i> <=42,<br>-33<= <i>k</i> <=51,<br>-48<= <i>l</i> <=11                                              |
| Reflections collected                                                                                                                                                              | 37719                                                                                                          | 18945                                                                                                            |
| Independent reflections                                                                                                                                                            | 2759 [R(int) = 0.0853]                                                                                         | 3882 [R(int) = 0.0375]                                                                                           |
| Data/restraints/parameters                                                                                                                                                         | 2759 / 139 / 139                                                                                               | 3882 / 0 / 148                                                                                                   |
| Goodness-of-fit on F <sup>2</sup>                                                                                                                                                  | 1.013                                                                                                          | 1.017                                                                                                            |
| Final R indexes [I>=2σ(I)]                                                                                                                                                         | R <sub>1</sub> = 0.0857, wR <sub>2</sub> = 0.2057                                                              | R <sub>1</sub> = 0.0806, wR <sub>2</sub> = 0.2212                                                                |
| Final R indexes [all data]                                                                                                                                                         | R <sub>1</sub> = 0.1037, wR <sub>2</sub> = 0.2175                                                              | R <sub>1</sub> = 0.0971, wR <sub>2</sub> = 0.2319                                                                |
| Largest diff. peak/hole / e Å <sup>-3</sup>                                                                                                                                        | 0.941 and -0.424                                                                                               | 0.547 and -0.379                                                                                                 |
| $R_1 = \sum   F_o  -  F_c   / \sum  F_o $ ; $wR_2 = \sum w( F_o ^2 -  F_c ^2) / \sum w(F_o^2)^{1/2}$ , where $w = 1/[\sigma^2(F_o^2) + (aP)^2 + bP]$ .<br>$P = (F_o^2 + 2F_c^2)/3$ |                                                                                                                |                                                                                                                  |

**Isosteric heat of adsorption calculation.**

A Virial equation comprising of the temperature-independent parameters  $a_i$  and  $b_i$  was employed to calculate the enthalpies of adsorption for C<sub>2</sub>H<sub>6</sub>, C<sub>2</sub>H<sub>4</sub> and C<sub>2</sub>H<sub>2</sub> in BUT-150 and BUT-151, which measured at different temperatures 273K and 298 K.

$$\ln(p) = \ln(N) + \left(\frac{1}{T}\right) \sum_{i=0}^m a_i \times N^i + \sum_{j=0}^n b_j \times N^j \quad (1)$$

$$Q_{st} = -R \times \sum_{i=0}^m a_i \times N^i \quad (2)$$

where  $P$  is the pressure (mmHg),  $N$  is the adsorbed quantity (mg/g),  $T$  is the temperature (K),  $R$  is the gas constant (8.314 J/(K·mol),  $a_i$  and  $b_i$  are virial coefficients.

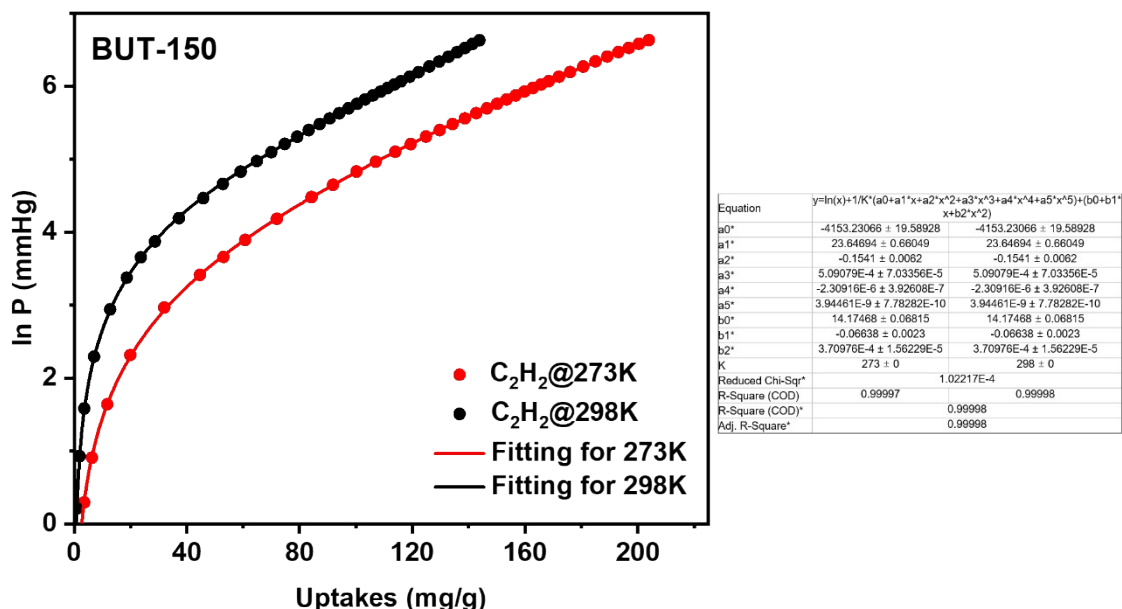

**Figure S7.** Virial fitting of the C<sub>2</sub>H<sub>2</sub> adsorption isotherms at 273 K and 298 K for BUT-150 for Q<sub>st</sub> calculation.

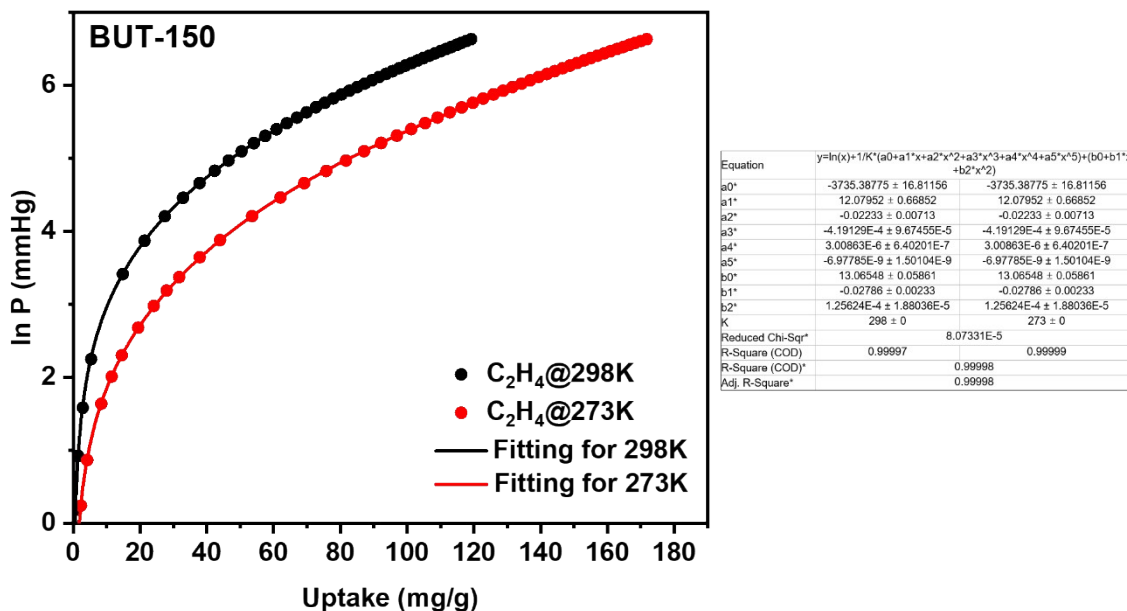

**Figure S8.** Virial fitting of the C<sub>2</sub>H<sub>4</sub> adsorption isotherms at 273 K and 298 K for BUT-150 for Q<sub>st</sub> calculation.



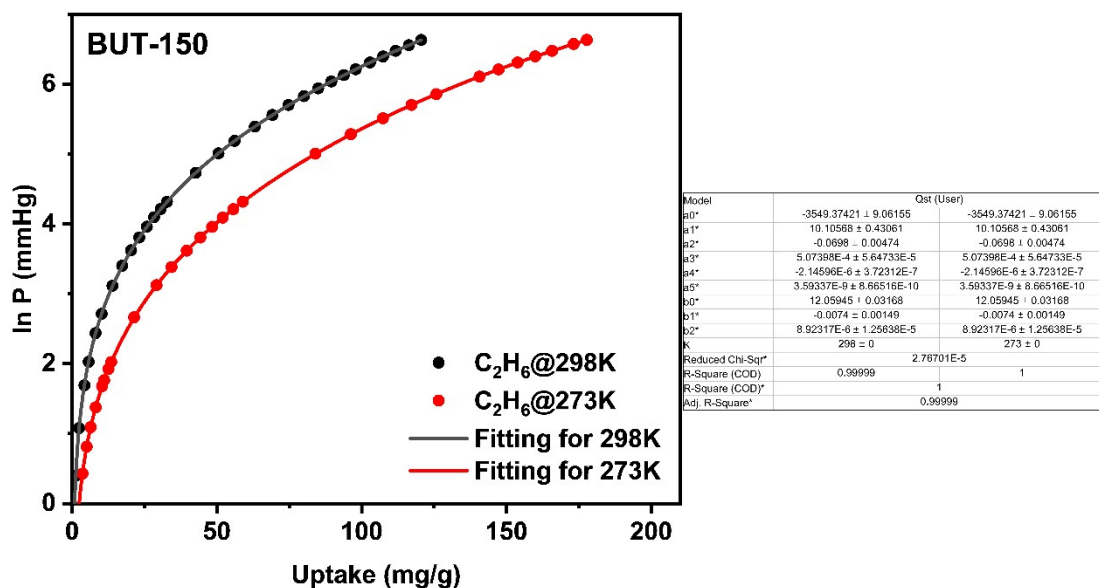

**Figure S9.** Virial fitting of the  $C_2H_6$  adsorption isotherms at 273 K and 298 K for BUT-150 for Qst calculation.

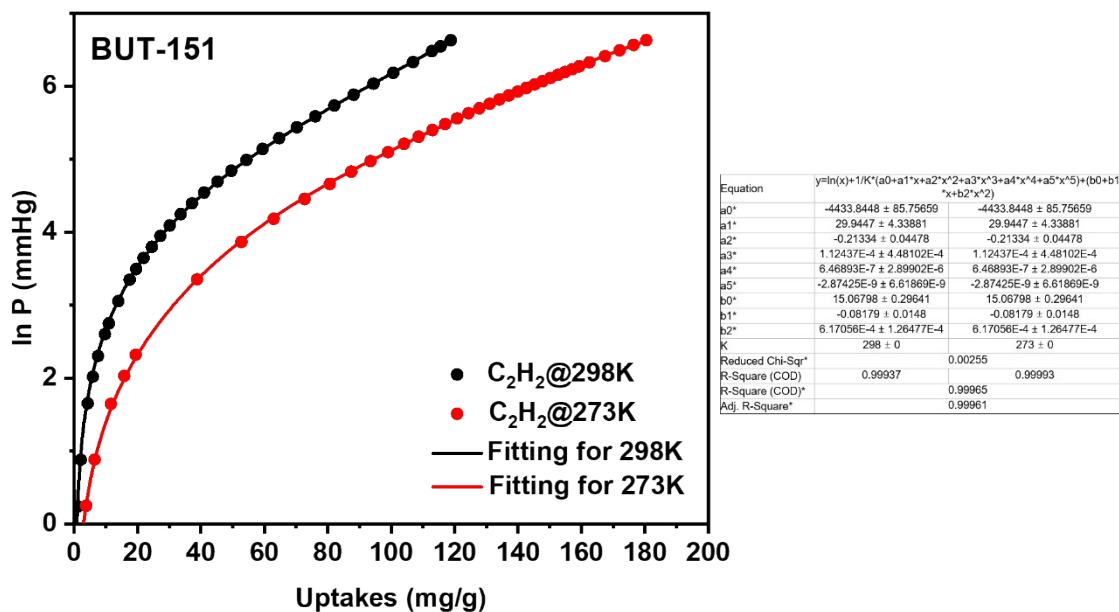

**Figure S10.** Virial fitting of the  $C_2H_2$  adsorption isotherms at 273 K and 298 K for BUT-151 for Qst calculation.

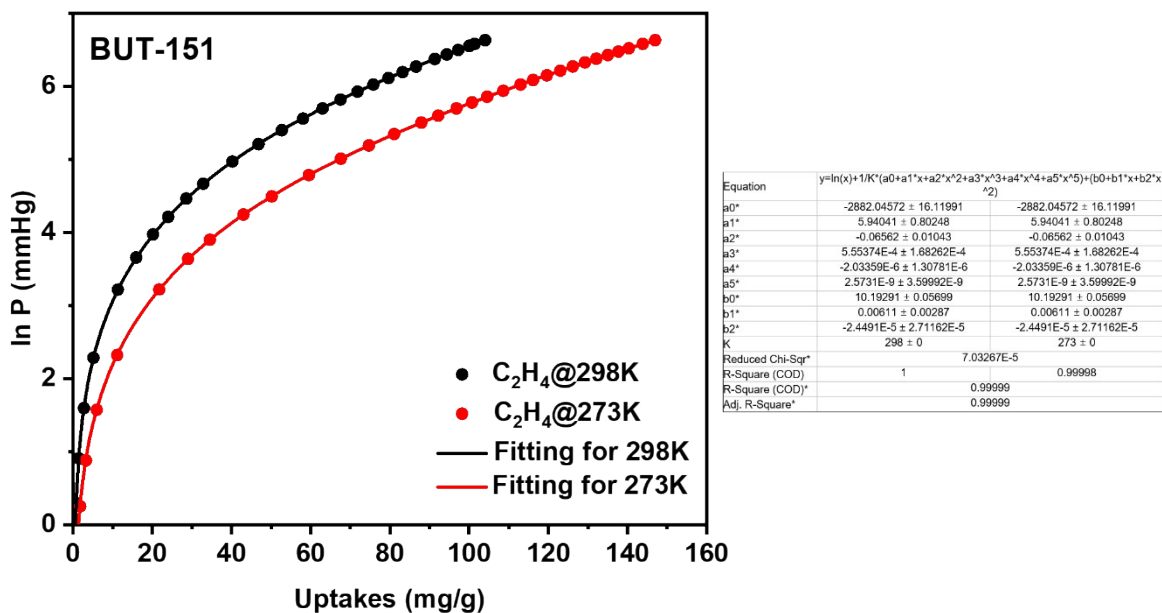

**Figure S11.** Virial fitting of the C<sub>2</sub>H<sub>4</sub> adsorption isotherms at 273 K and 298 K for BUT-151 for Qst calculation.

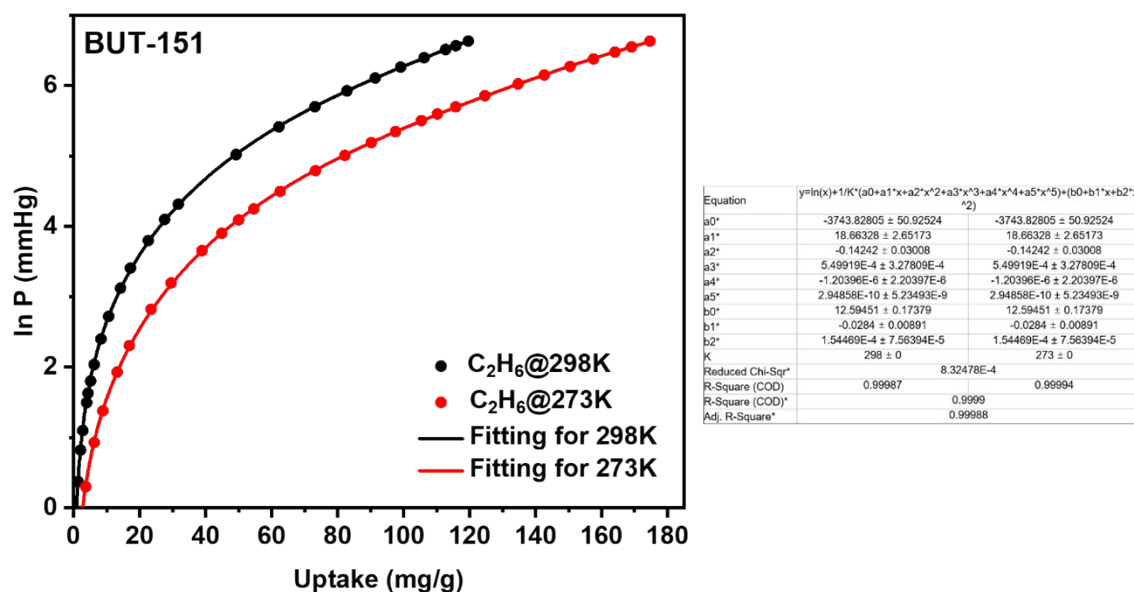

**Figure S12.** Virial fitting of the C<sub>2</sub>H<sub>6</sub> adsorption isotherms at 273 K and 298 K for BUT-151 for Qst calculation.

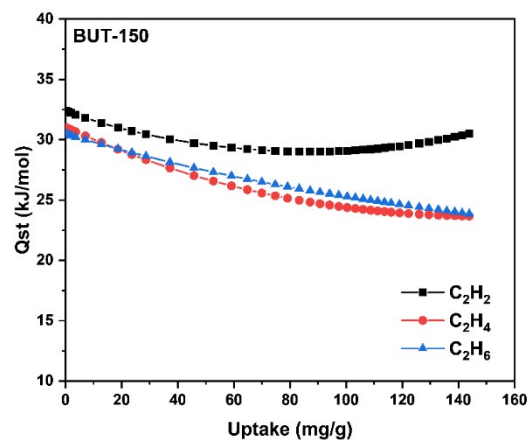

**Figure S13.** Isosteric heats of adsorption of  $C_2H_2$ ,  $C_2H_4$  and  $C_2H_6$  for BUT-150 calculated using Virial method with adsorption isotherms at 273 and 298 K.

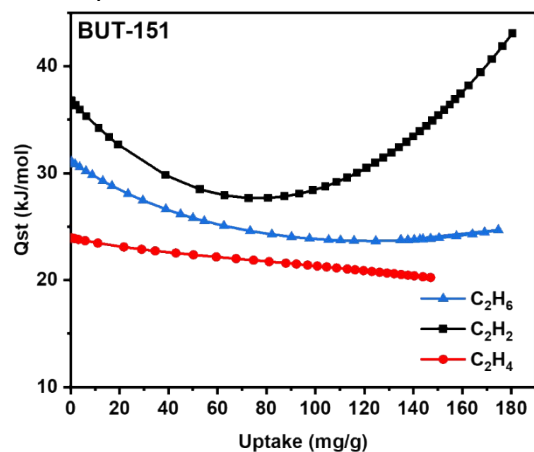

**Figure S14.** Isosteric heats of adsorption of  $C_2H_2$ ,  $C_2H_4$  and  $C_2H_6$  on BUT-151 calculated using Virial method with adsorption isotherms at 273 and 298 K.

#### Calculation of selectivity via ideal adsorption solution theory (IAST).

It was used to estimate the composition of the adsorbed phase from the data of single component isotherms and predict the selectivities of binary mixtures  $C_2H_2/C_2H_4$  and  $C_2H_6/C_2H_4$ . IAST calculations of  $C_2H_2/C_2H_4$  (50/50, v/v,) and  $C_2H_6/C_2H_4$  (50/50, v/v) mixtures were performed by:

$$S_{ads} = \frac{q_1/q_2}{p_1/p_2} \quad (3)$$

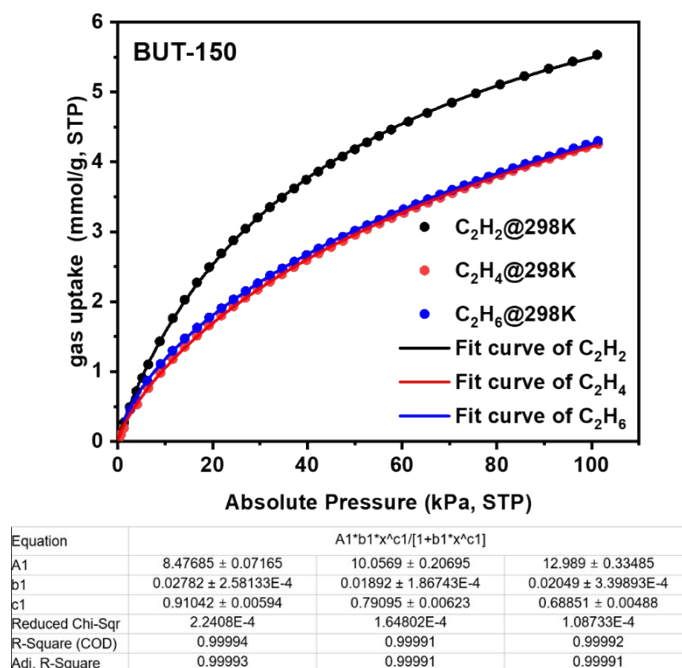

**Figure S15.** Adsorption isotherms of BUT-150 at 298 K and fitting parameters by single-site Langmuir-Freundlich model.

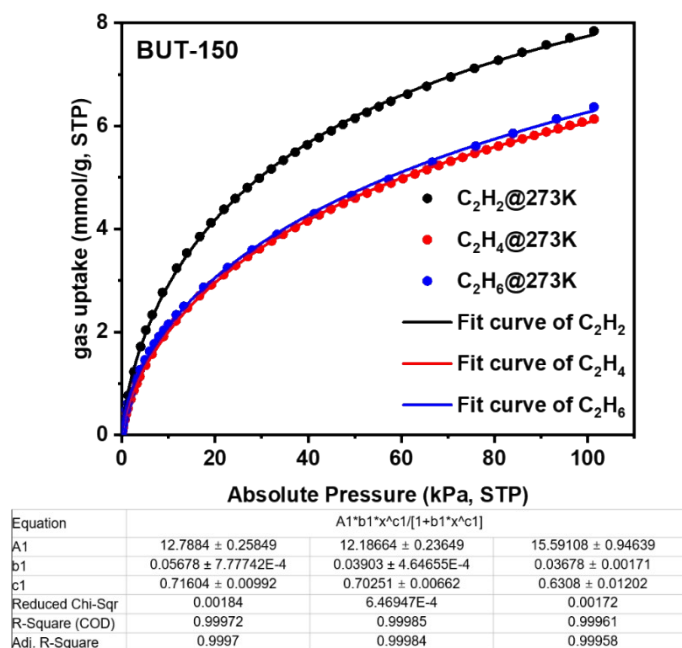

**Figure S16.** Adsorption isotherms of BUT-150 at 273 K and fitting parameters by single-site Langmuir-Freundlich model.

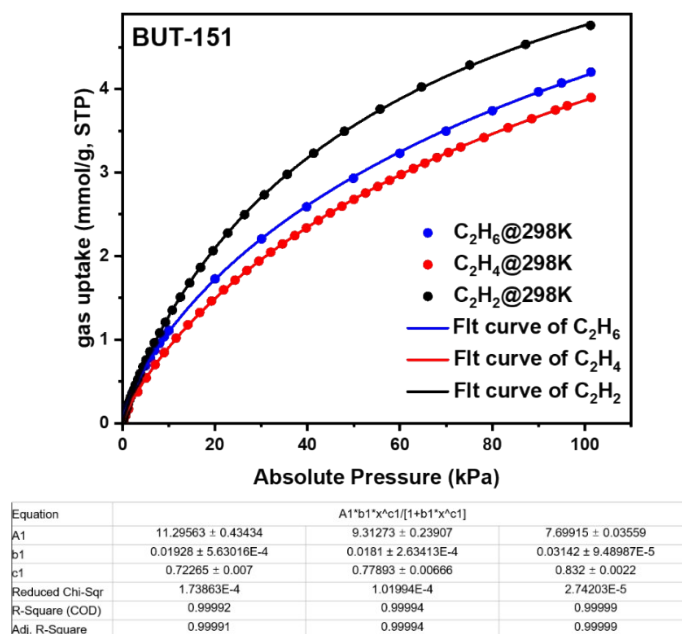

**Figure S17.** Adsorption isotherms of BUT-151 at 298 K and fitting parameters by single-site Langmuir-Freundlich model.

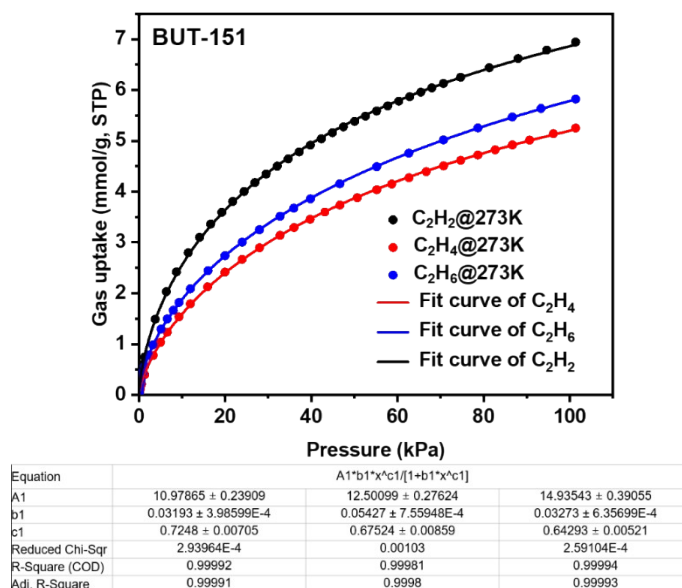

**Figure S18.** Adsorption isotherms of BUT-151 at 273 K and fitting parameters by single-site Langmuir-Freundlich model.

### DFT Computational Details.

DFT calculations were carried out using the CP2K code.<sup>4</sup> All calculations employed a mixed Gaussian and planewave basis sets. Core electrons were represented with norm-conserving Goedecker-Teter-Hutter pseudopotentials,<sup>5-7</sup> and the valence electron wavefunction was expanded in a triplet-zeta basis set with polarization functions<sup>8</sup> along

with an auxiliary plane wave basis set with an energy cutoff of 360 eV. The generalized gradient approximation exchange-correlation functional of Perdew, Burke, and Enzerhof (PBE)<sup>9</sup> was used. Each configuration was optimized with the Broyden-Fletcher-Goldfarb-Shanno (BGFS) algorithm with SCF convergence criteria of  $1.0 \times 10^{-8}$  au. To compensate the long-range van der Waals dispersion interaction between the adsorbate and the zeolite, the DFT-D3 scheme<sup>10</sup> with an empirical damped potential term was added into the energies obtained from exchange-correlation functional in all calculations.

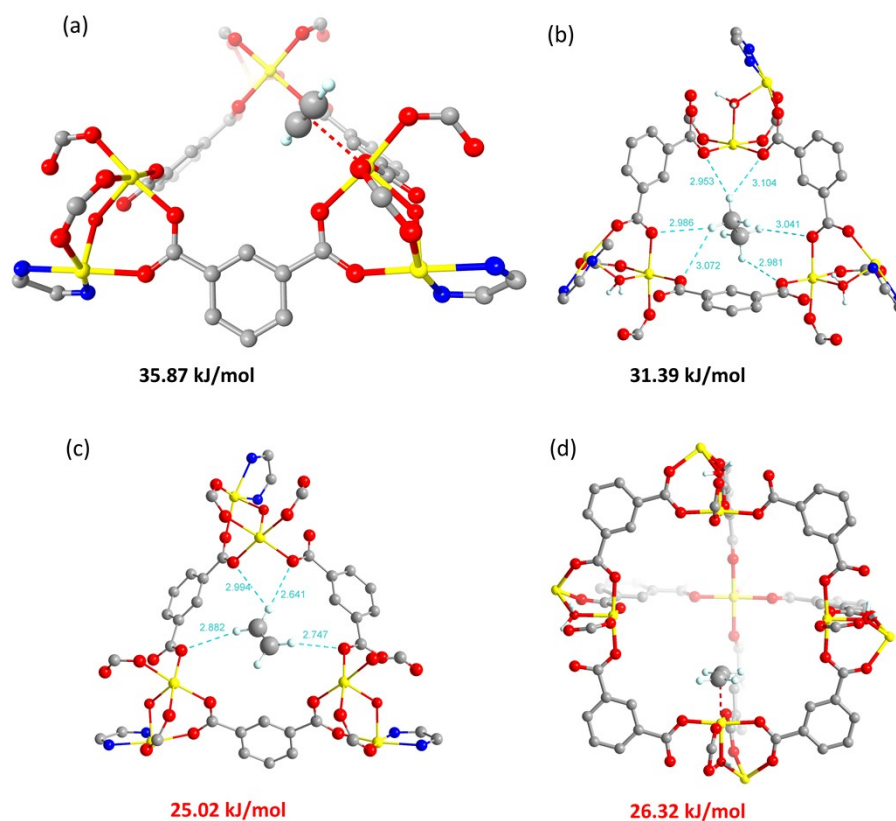

**Figure S19.** The preferential adsorption sites and corresponding adsorption energies of (a)  $C_2H_2$ , (b)  $C_2H_6$  and (c,d)  $C_2H_4$  determined by DFT calculation.

#### Kinetic Selectivity and Equilibrium Uptake of Acetylene Ethylene and Ethane.

The adsorption kinetics were measured on a MicrotracBEL BELSORP-Max II adsorption equipment at 273 K. The as-synthesized samples (about 200 mg) were degasified through dynamic vacuuming at 393 K for 6 h before the measurements.

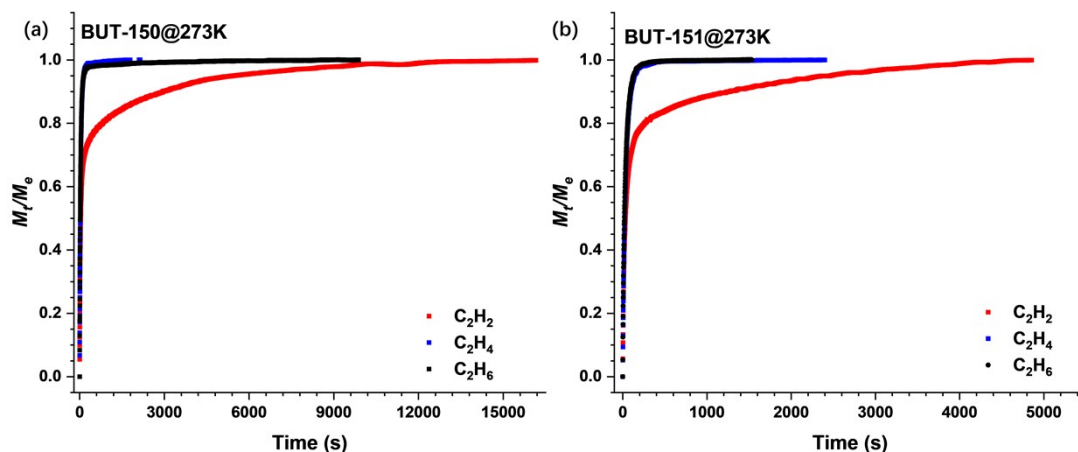

**Figure S20.** (a) BUT-150 and (b) BUT-151 kinetic uptake plots of ethylene (blue), ethane (black) and acetylene (red) at 273 K.

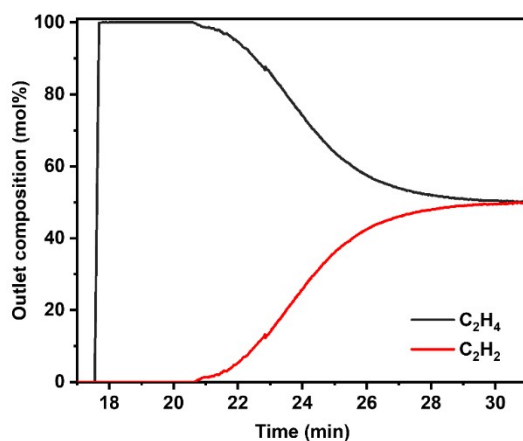

**Figure S21.** Breakthrough curve of BUT-150 for the separation of 1:1 (v/v)  $C_2H_2/C_2H_4$  gas mixture at 298 K and 1 atm, where the flow rate of the mixed gas is 2 mL/min.

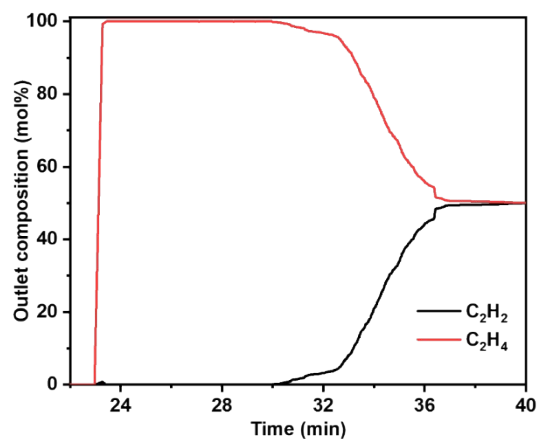

**Figure S22.** Breakthrough curve of BUT-151 for the separation of 1:1 (v/v)  $C_2H_2/C_2H_4$  gas mixture at 298 K and 1 atm, where the flow rate of the mixed gas is 2 mL/min.

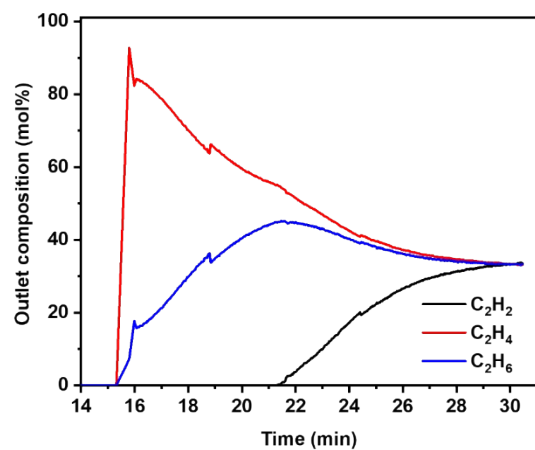

**Figure S23.** Breakthrough curve of BUT-150 for the separation of a ternary 1:1:1 (v/v/v) C<sub>2</sub>H<sub>2</sub>/C<sub>2</sub>H<sub>4</sub>/C<sub>2</sub>H<sub>6</sub> gas mixture at 298 K and 1 atm, where the flow rate of the mixed gas is 2 mL/min.



**Table S2.** The adsorption capacity and separation selectivity of C<sub>2</sub>H<sub>2</sub> and C<sub>2</sub>H<sub>6</sub> selective materials at room temperature and 1 bar.

| MOF                                    | C <sub>2</sub> H <sub>6</sub> uptake<br>(mmol/g) | C <sub>2</sub> H <sub>2</sub> uptake<br>(mmol/g) | C <sub>2</sub> H <sub>6</sub> /C <sub>2</sub> H <sub>4</sub><br>(1/1, v/v) | C <sub>2</sub> H <sub>2</sub> /C <sub>2</sub> H <sub>4</sub><br>(1/1, v/v) | Ref.      |
|----------------------------------------|--------------------------------------------------|--------------------------------------------------|----------------------------------------------------------------------------|----------------------------------------------------------------------------|-----------|
| BUT-150 <sup>※</sup>                   | 4.30                                             | 5.53                                             | 1.15                                                                       | 1.82                                                                       | This work |
| BUT-151                                | 3.99                                             | 4.8                                              | 1.26                                                                       | 1.61                                                                       | This work |
| BUT-150 <sup>※</sup>                   | 6.38                                             | 7.84                                             | 1.13                                                                       | 1.97                                                                       | This work |
| BUT-151 <sup>※</sup>                   | 5.82                                             | 6.02                                             | 1.36                                                                       | 2.31                                                                       | This work |
| TJT-100                                | 3.75                                             | 4.46                                             | 1.8*                                                                       | 1.2*                                                                       | 11        |
| TJT-100 <sup>※</sup>                   | 4.38                                             | 5.7                                              | 3*                                                                         | 3.8*                                                                       | 11        |
| Azole-Th-1                             | 4.47                                             | 3.62                                             | 1.46                                                                       | 1.0                                                                        | 12        |
| ZJNU-115                               | 4.20                                             | 4.73                                             | 1.56                                                                       | 2.05*                                                                      | 13        |
| ZJNU-7                                 | 4.13                                             | 5.04                                             | 1.56                                                                       | 1.77                                                                       | 14        |
| Ag-PCM102 <sup>‡</sup>                 | 3.69                                             | 4.59                                             | --                                                                         | 1.5                                                                        | 15        |
| UPC-612                                | 3.57                                             | 3.01                                             | 1.4                                                                        | 1.08                                                                       | 16        |
| UPC-613                                | 2.54                                             | 2.83                                             | 1.45                                                                       | 1.39                                                                       | 16        |
| MOF-525                                | 2.70                                             | 2.64                                             | 1.25                                                                       | 1.44                                                                       | 16        |
| MOF-525 (Co)                           | 2.21                                             | 2.62                                             | 1.1                                                                        | 1.87                                                                       | 16        |
| NUM-9                                  | 2.47                                             | 2.36                                             | 1.61                                                                       | 1.45                                                                       | 17        |
| NUM-9 <sup>※</sup>                     | 2.9                                              | 2.95                                             | 1.85                                                                       | 1.52                                                                       | 17        |
| NPU-1                                  | 4.50                                             | 5.09                                             | 1.32                                                                       | 1.4                                                                        | 18        |
| NPU-2                                  | 4.42                                             | 4.02                                             | 1.52                                                                       | 1.25                                                                       | 18        |
| NPU-3                                  | 3.33                                             | 2.54                                             | 3.2                                                                        | 1.3                                                                        | 18        |
| UiO-67                                 | 3.05                                             | 2.09                                             | 1.49                                                                       | 1.07*                                                                      | 19        |
| UiO-67-(NH <sub>2</sub> ) <sub>2</sub> | 5.32                                             | 5.9                                              | 1.7                                                                        | 2.1*                                                                       | 19        |
| Zn-atz-ipa                             | 1.81                                             | 1.99                                             | 1.7                                                                        | --                                                                         | 20        |
| Zn-atz-oba                             | 2.05                                             | 2.77                                             | 1.27                                                                       | 1.43                                                                       | 21        |

※: At 1 bar and 273 K temperature; ‡: At 1 bar and 303 K temperature; \*: IAST selectivity for 1/99 gas mixture;

## Reference

1. W. Liang, T. L. Church, S. Zheng, C. Zhou, B. S. Haynes and D. M. D'Alessandro, *Chem. Eur. J.*, 2015, **21**, 18576-18579.
2. Z. Chen, S. Xiang, T. Liao, Y. Yang, Y.-S. Chen, Y. Zhou, D. Zhao and B. Chen, *Cryst. Growth Des.*, 2010, **10**, 2775-2779.
3. C.-Y. Chen, H.-C. Lu, C.-G. Wu, J.-G. Chen and K.-C. Ho, *Adv. Funct. Mater.*, 2007, **17**, 29-36.

4. J. VandeVondele, M. Krack, F. Mohamed, M. Parrinello, T. Chassaing and J. Hutter, *Comput. Phys. Commun.*, 2005, **167**, 103-128.
5. S. Goedecker, M. Teter and J. Hutter, *Phys. Rev. B*, 1996, **54**, 1703-1710.
6. C. Hartwigsen, S. Goedecker and J. Hutter, *Phys. Rev. B*, 1998, **58**, 3641-3662.
7. M. Krack and M. Parrinello, *Phys. Chem. Chem. Phys.*, 2000, **2**, 2105-2112.
8. J. VandeVondele and J. Hutter, *J. Chem. Phys.*, 2007, **127**, 114105.
9. J. P. Perdew, K. Burke and M. Ernzerhof, *Phys. Rev. Lett.*, 1996, **77**, 3865.
10. S. Grimme, J. Antony, S. Ehrlich and H. Krieg, *J. Chem. Phys.*, 2010, **132**, 154104.
11. H.-G. Hao, Y.-F. Zhao, D.-M. Chen, J.-M. Yu, K. Tan, S. Ma, Y. Chabal, Z.-M. Zhang, J. M. Dou, Z.-H. Xiao, G. Day, H.-C. Zhou and T. B. Lu, *Angew. Chem. Int. Ed.*, 2018, **57**, 16067-16071.
12. Z. Xu, X. Xiong, J. Xiong, R. Krishna, L. Li, Y. Fan, F. Luo and B. Chen, *Nat. Commun.*, 2020, **11**, 3163.
13. L. Fan, P. Zhou, X. Wang, L. Yue, L. Li and Y. He, *Inorg. Chem.*, 2021, **60**, 10819-10829.
14. Z. Jiang, L. Fan, P. Zhou, T. Xu, S. Hu, J. Chen, D.-L. Chen and Y. He, *Inorg. Chem. Front.*, 2021, **8**, 1243-1252.
15. R. E. Sikma, N. Katyal, S. K. Lee, J. W. Fryer, C. G. Romero, S. K. Emslie, E. L. Taylor, V. M. Lynch, J. S. Chang, G. Henkelman and S. M. Humphrey, *J. Am. Chem. Soc.*, 2021, **143**, 13710-13720.
16. Y. Wang, C. Hao, W. Fan, M. Fu, X. Wang, Z. Wang, L. Zhu, Y. Li, X. Lu, F. Dai, Z. Kang, R. Wang, W. Guo, S. Hu and D. Sun, *Angew. Chem. Int. Ed.*, 2021, **60**, 11350.
17. S.-Q. Yang, F.-Z. Sun, P. Liu, L. Li, R. Krishna, Y.-H. Zhang, Q. Li, L. Zhou and T.-L. Hu, *ACS Appl. Mater. Interfaces*, 2021, **13**, 962-969.
18. B. Zhu, J.-W. Cao, S. Mukherjee, T. Pham, T. Zhang, T. Wang, X. Jiang, K. A. Forrest, M. J. Zaworotko and K.-J. Chen, *J. Am. Chem. Soc.*, 2021, **143**, 1485-1492.
19. X.-W. Gu, J.-X. Wang, E. Wu, H. Wu, W. Zhou, G. Qian, B. Chen and B. Li, *J. Am. Chem. Soc.*, 2022, **144**, 2614-2623.
20. K.-J. Chen, D. G. Madden, S. Mukherjee, T. Pham, K. A. Forrest, A. Kumar, B. Space, J. Kong, Q.-Y. Zhang, M. J. Zaworotko, *Science*, 2019, **366**, 241-246.
21. J.-W. Cao, S. Mukherjee, T. Pham, Y. Wang, T. Wang, T. Zhang, X. Jiang, H. J. Tang, K. A. Forrest, B. Space, M. J. Zaworotko and K. J. Chen, *Nat. Commun.*, 2021, **12**, 6507.
